# Supplementary material
Source: PubMed Central journal article supplement (PMC2536647)
Supplement: NIHMS60325-supplement-SI1.pdf [file NIHMS60325-supplement-SI1.pdf]

# Supporting Information

VTVH-MCD and DFT Studies of Thiolate Bonding to  $\{\text{FeNO}\}^7/\{\text{FeO}_2\}^8$   
Complexes of Isopenicillin *N* synthase: Substrate Determination of Oxidase  
versus Oxygenase Activity in Non-Heme Fe Enzymes

*Christina D. Brown*<sup>1</sup>, *Michael L. Neidig*<sup>1</sup>, *Matthew B. Neibergall*<sup>2</sup>, *John D. Lipscomb*<sup>2\*</sup>,  
*Edward I. Solomon*<sup>1\*</sup>

<sup>1</sup> Department of Chemistry, Stanford University, Stanford, CA 94305-5080, USA;

<sup>2</sup> Department of Biochemistry, Molecular Biology and Biophysics and the Center for  
Metals in Biocatalysis, University of Minnesota, Minneapolis, MN 55455

## Supporting Information Table 1:

Coordinates [ $\text{\AA}$ ] of optimized Fe-IPNS-ACV-NO Complex

| Atom | X         | Y         | Z         |
|------|-----------|-----------|-----------|
| C    | -2.324936 | -1.174203 | -2.584401 |
| N    | -2.171501 | -1.154039 | -1.267761 |
| C    | -2.809322 | -2.282266 | -0.782526 |
| C    | -3.358287 | -3.001852 | -1.821474 |
| N    | -3.037747 | -2.270425 | -2.960698 |
| Fe   | -0.882464 | 0.156085  | -0.063283 |
| N    | 0.163266  | 0.443787  | -1.425109 |
| O    | 0.825161  | 0.045881  | -2.324347 |
| C    | -4.122883 | -4.286907 | -1.869282 |
| N    | -2.295432 | 1.819558  | -0.498278 |
| C    | -1.982137 | 3.136359  | -0.774631 |
| C    | -3.130056 | 3.892859  | -0.871542 |
| N    | -4.159846 | 2.985614  | -0.648403 |
| C    | -3.613715 | 1.758289  | -0.423765 |
| C    | -3.365082 | 5.347113  | -1.130708 |
| O    | -0.102699 | 1.626769  | 1.268923  |
| O    | -2.283767 | -0.335973 | 1.472525  |
| C    | -2.484294 | 0.229661  | 2.609232  |
| C    | -3.557429 | -0.368113 | 3.537765  |
| C    | -4.255087 | -1.625674 | 3.023923  |
| S    | 0.412684  | -1.600201 | 0.805536  |
| C    | 1.479238  | -2.396606 | -0.462789 |
| C    | 2.853234  | -2.829786 | 0.078728  |
| N    | 2.698617  | -3.895455 | 1.068822  |
| O    | -1.881244 | 1.250827  | 3.041945  |
| C    | 3.725548  | -1.656125 | 0.599000  |
| O    | 4.344306  | -1.741563 | 1.662559  |
| N    | 3.821618  | -0.555679 | -0.215133 |
| C    | 4.704753  | 0.563509  | 0.110652  |
| C    | 5.512954  | 0.946461  | -1.142390 |
| O    | 5.421781  | 0.412423  | -2.243774 |
| C    | 4.007554  | 1.803684  | 0.818710  |
| C    | 3.341388  | 1.349932  | 2.121319  |
| C    | 3.025751  | 2.518006  | -0.117183 |
| O    | 6.391868  | 1.973541  | -0.846404 |
| H    | 6.879028  | 2.144706  | -1.681223 |
| H    | 5.426845  | 0.159698  | 0.842817  |
| H    | 4.831678  | 2.495898  | 1.059997  |
| H    | 2.845456  | 2.201928  | 2.614754  |
| H    | 2.593618  | 0.563543  | 1.923706  |
| H    | 4.068516  | 0.916851  | 2.823702  |
| H    | 2.565354  | 3.380188  | 0.390357  |
| H    | 3.527797  | 2.891055  | -1.025049 |
| H    | 2.207604  | 1.849259  | -0.426177 |
| H    | 3.407092  | -0.570195 | -1.142994 |
| H    | 3.559782  | -3.902395 | 1.628408  |
| H    | 1.972481  | -3.586603 | 1.727829  |
| H    | 0.963159  | -3.306742 | -0.804826 |
| H    | 1.597089  | -1.744083 | -1.342500 |
| H    | -4.249323 | -4.676786 | -0.850330 |
| H    | -5.127610 | -4.158375 | -2.306099 |

|   |           |           |           |
|---|-----------|-----------|-----------|
| H | -3.596073 | -5.057544 | -2.456468 |
| H | -3.270753 | -2.526068 | -3.914903 |
| H | -1.934831 | -0.440988 | -3.283282 |
| H | -2.811777 | -2.486056 | 0.282849  |
| H | -5.015737 | -1.974732 | 3.740739  |
| H | -4.752634 | -1.440436 | 2.059570  |
| H | -3.531313 | -2.440051 | 2.870384  |
| H | -3.061357 | -0.559676 | 4.503585  |
| H | -4.285073 | 0.436627  | 3.740685  |
| H | 0.722334  | 1.278375  | 1.658140  |
| H | -0.804655 | 1.589042  | 2.041588  |
| H | -2.402083 | 5.856453  | -1.271715 |
| H | -3.968371 | 5.516520  | -2.038621 |
| H | -3.879989 | 5.838424  | -0.288163 |
| H | -5.149773 | 3.207754  | -0.622366 |
| H | -4.186397 | 0.866806  | -0.190684 |
| H | -0.948564 | 3.456606  | -0.858633 |
| H | 3.410384  | -3.248821 | -0.785601 |

Supporting Information Table 2: Key Computational Results for Fe-IPNS-ACV-NO

| Bond length         | (Å)  | Bond Angle             | (Degrees) | Total Atomic Charge (Mulliken) |       |
|---------------------|------|------------------------|-----------|--------------------------------|-------|
| Fe-S                | 2.35 | S-Fe-N <sub>eq</sub>   | 169       | S                              | -0.47 |
| Fe-N <sub>NO</sub>  | 1.74 | S-Fe-N <sub>ax</sub>   | 95        | Fe                             | 1.35  |
| N-O                 | 1.19 | S-Fe-NO                | 95        | NO                             | -0.37 |
| Fe-O <sub>OH2</sub> | 2.13 | S- Fe-O <sub>Asp</sub> | 86        | Total Spin Density             |       |
| Fe-O <sub>Asp</sub> | 2.14 | S- Fe-O <sub>OH</sub>  | 95        | S                              | 0.13  |
| Fe-N <sub>eq</sub>  | 2.23 | Fe-N-O                 | 151       | Fe                             | 3.44  |
| Fe-N <sub>ax</sub>  | 2.20 |                        |           | NO                             | -0.79 |

## Supporting Information Table 3:

Coordinates [ $\text{\AA}$ ] of optimized Fe-IPNS-ACV-O<sub>2</sub> Complex

| Atom | X         | Y         | Z         |
|------|-----------|-----------|-----------|
| C    | -2.722403 | -2.238448 | -1.117472 |
| N    | -1.806583 | -1.221610 | -1.328178 |
| C    | -1.358688 | -1.365601 | -2.570553 |
| N    | -1.957898 | -2.434419 | -3.158297 |
| C    | -2.836424 | -3.014901 | -2.248929 |
| Fe   | -1.030086 | 0.155353  | 0.140016  |
| O    | -2.636728 | -0.359749 | 1.274780  |
| C    | -2.953772 | 0.015444  | 2.469881  |
| C    | -4.144969 | -0.683855 | 3.129197  |
| C    | -4.732595 | -1.873270 | 2.370343  |
| C    | -3.653741 | -4.227789 | -2.562751 |
| N    | -2.348003 | 1.803745  | -0.548718 |
| C    | -3.662438 | 1.734020  | -0.695654 |
| N    | -4.176458 | 2.968156  | -0.946347 |
| C    | -3.135177 | 3.890453  | -0.953689 |
| C    | -2.008795 | 3.134770  | -0.707631 |
| C    | -3.351103 | 5.357651  | -1.162093 |
| S    | 0.332637  | -1.376559 | 1.236329  |
| C    | 1.270400  | -2.275238 | -0.050437 |
| C    | 2.667782  | -2.718445 | 0.403998  |
| N    | 2.561871  | -3.700900 | 1.487817  |
| O    | 0.245946  | 0.757797  | -1.079907 |
| O    | 1.140706  | 0.164334  | -1.824283 |
| O    | -0.489725 | 1.638804  | 1.572696  |
| C    | 3.682759  | -1.582404 | 0.727297  |
| O    | 4.510511  | -1.752285 | 1.630080  |
| N    | 3.702146  | -0.477096 | -0.082565 |
| C    | 4.713348  | 0.550464  | 0.103147  |
| C    | 5.463704  | 0.825885  | -1.205222 |
| O    | 5.319076  | 0.216173  | -2.253987 |
| C    | 4.182799  | 1.852334  | 0.776592  |
| C    | 3.535013  | 1.524333  | 2.128283  |
| C    | 3.223662  | 2.639723  | -0.127495 |
| O    | -2.377723 | 0.914623  | 3.132016  |
| O    | 6.366822  | 1.864457  | -1.022655 |
| H    | 6.822695  | 1.957281  | -1.886830 |
| H    | 5.445114  | 0.100247  | 0.797425  |
| H    | 5.073750  | 2.476207  | 0.959044  |
| H    | 3.215904  | 2.449503  | 2.635263  |
| H    | 2.652005  | 0.878362  | 1.989127  |
| H    | 4.226858  | 0.984166  | 2.792043  |
| H    | 2.899261  | 3.563796  | 0.377928  |
| H    | 3.704849  | 2.932086  | -1.074840 |
| H    | 2.321269  | 2.056892  | -0.367991 |
| H    | 2.968384  | -0.323048 | -0.778926 |
| H    | 3.491928  | -3.742644 | 1.922611  |
| H    | 1.959331  | -3.288163 | 2.211087  |
| H    | 0.698199  | -3.180546 | -0.304507 |
| H    | 1.332759  | -1.645476 | -0.957271 |
| H    | -4.260694 | -4.499760 | -1.688674 |
| H    | -4.340793 | -4.058753 | -3.408928 |

|   |           |           |           |
|---|-----------|-----------|-----------|
| H | -3.021537 | -5.096426 | -2.811299 |
| H | -1.769320 | -2.769123 | -4.097927 |
| H | -0.579651 | -0.762061 | -3.029094 |
| H | -3.218798 | -2.336015 | -0.157951 |
| H | -5.577686 | -2.310522 | 2.925236  |
| H | -5.098065 | -1.572346 | 1.376534  |
| H | -3.976727 | -2.660061 | 2.226750  |
| H | -3.809786 | -0.985327 | 4.134898  |
| H | -4.912078 | 0.091425  | 3.301510  |
| H | 0.363278  | 1.383011  | 1.974155  |
| H | -1.210489 | 1.466465  | 2.296697  |
| H | -2.385715 | 5.880456  | -1.127314 |
| H | -3.813377 | 5.575523  | -2.139472 |
| H | -3.994004 | 5.793505  | -0.379251 |
| H | -5.158713 | 3.183202  | -1.083877 |
| H | -4.257856 | 0.831834  | -0.604859 |
| H | -0.978405 | 3.460100  | -0.610593 |
| H | 3.115373  | -3.237138 | -0.469160 |

Supporting Information Table 3: Key Computational Results for Fe-IPNS-ACV-O<sub>2</sub>

| Bond length         | (Å)  | Bond Angle             | (Degrees) | Total Atomic Charge (Mulliken) |       |
|---------------------|------|------------------------|-----------|--------------------------------|-------|
| Fe-S                | 2.33 | S-Fe-N <sub>eq</sub>   | 170       | S                              | -0.45 |
| Fe-O <sub>O2</sub>  | 1.87 | S-Fe-N <sub>ax</sub>   | 96        | Fe                             | 1.46  |
| O-O                 | 1.31 | S-Fe-O <sub>2</sub>    | 97        | O <sub>2</sub>                 | -0.56 |
| Fe-O <sub>OH2</sub> | 2.13 | S- Fe-O <sub>Asp</sub> | 92        | Total Spin Density             |       |
| Fe-O <sub>Asp</sub> | 2.03 | S- Fe-O <sub>OH2</sub> | 90        | S                              | 0.16  |
| Fe-N <sub>eq</sub>  | 2.22 | Fe-O-O                 | 134       | Fe                             | 3.79  |
| Fe-N <sub>ax</sub>  | 2.16 |                        |           | O <sub>2</sub>                 | -0.22 |

## Supporting Information Table 5:

Coordinates [ $\text{\AA}$ ] of optimized Fe-IPNS-ACV Complex

| Atom | X         | Y         | Z         |
|------|-----------|-----------|-----------|
| C    | -3.483321 | 1.805638  | -0.217130 |
| N    | -2.209484 | 1.882310  | -0.578327 |
| C    | -2.004321 | 3.198136  | -0.961284 |
| C    | -3.165601 | 3.932083  | -0.829536 |
| N    | -4.095269 | 3.012667  | -0.358593 |
| Fe   | -0.906297 | 0.088404  | -0.236734 |
| S    | 0.446841  | -1.706334 | 0.609224  |
| C    | 1.552171  | -2.430520 | -0.706262 |
| C    | 2.958447  | -2.839491 | -0.204087 |
| C    | 3.816570  | -1.656588 | 0.325248  |
| N    | 3.796809  | -0.480260 | -0.396591 |
| C    | 4.662465  | 0.626528  | -0.019134 |
| C    | 3.972111  | 1.797639  | 0.730574  |
| C    | 2.983090  | 2.539914  | -0.179273 |
| C    | -3.507318 | 5.370434  | -1.079049 |
| N    | -2.125952 | -1.164694 | -1.446761 |
| C    | -2.821494 | -0.973920 | -2.560848 |
| N    | -3.623844 | -2.045280 | -2.805368 |
| C    | -3.433620 | -2.977358 | -1.789713 |
| C    | -2.497439 | -2.406852 | -0.961524 |
| C    | -4.158083 | -4.278905 | -1.712180 |
| O    | 0.107596  | 1.522632  | 0.867897  |
| O    | -2.254798 | -0.339842 | 1.323185  |
| C    | -2.230659 | 0.213666  | 2.477655  |
| O    | -1.539415 | 1.227004  | 2.792993  |
| C    | -3.114483 | -0.389566 | 3.576976  |
| C    | -3.970246 | -1.590377 | 3.164256  |
| N    | 2.835295  | -3.912203 | 0.793166  |
| O    | 4.502789  | -1.774713 | 1.342706  |
| C    | 5.435411  | 1.081203  | -1.260282 |
| O    | 6.301796  | 2.141141  | -0.965729 |
| O    | 5.345162  | 0.608060  | -2.402849 |
| C    | 3.331822  | 1.285667  | 2.026833  |
| H    | 6.745235  | 2.334556  | -1.819480 |
| H    | 5.404653  | 0.190197  | 0.675151  |
| H    | 4.782251  | 2.497725  | 0.996514  |
| H    | 2.792313  | 2.097479  | 2.539578  |
| H    | 2.630200  | 0.458092  | 1.829435  |
| H    | 4.090724  | 0.884486  | 2.715232  |
| H    | 2.453826  | 3.329393  | 0.374691  |
| H    | 3.503553  | 3.010351  | -1.029936 |
| H    | 2.214293  | 1.859486  | -0.577136 |
| H    | 3.409637  | -0.474719 | -1.335426 |
| H    | 3.696516  | -3.889131 | 1.352165  |
| H    | 2.097509  | -3.610992 | 1.444397  |
| H    | 1.073392  | -3.343512 | -1.091903 |
| H    | 1.648109  | -1.734508 | -1.555949 |
| H    | -3.821985 | -4.829108 | -0.823183 |
| H    | -5.249699 | -4.143821 | -1.628222 |
| H    | -3.965597 | -4.917270 | -2.590946 |
| H    | -4.239857 | -2.154540 | -3.604819 |

|   |           |           |           |
|---|-----------|-----------|-----------|
| H | -2.782673 | -0.093408 | -3.194585 |
| H | -2.050653 | -2.788797 | -0.048637 |
| H | -4.552377 | -1.967285 | 4.020411  |
| H | -4.674916 | -1.323520 | 2.361436  |
| H | -3.338526 | -2.406895 | 2.786346  |
| H | -2.436940 | -0.663789 | 4.403361  |
| H | -3.738852 | 0.427576  | 3.978221  |
| H | 0.885729  | 1.048332  | 1.226423  |
| H | -0.564682 | 1.536906  | 1.682045  |
| H | -2.619919 | 5.904501  | -1.445341 |
| H | -4.301380 | 5.482301  | -1.836350 |
| H | -3.843898 | 5.877958  | -0.159678 |
| H | -5.055069 | 3.220767  | -0.102609 |
| H | -3.959737 | 0.916574  | 0.182669  |
| H | -1.025839 | 3.543481  | -1.281399 |
| H | 3.507983  | -3.242044 | -1.080745 |

## Supporting Information Table 6:

Coordinates [ $\text{\AA}$ ] of optimized Fe-PAH Complex

| Atom | X         | Y         | Z         |
|------|-----------|-----------|-----------|
| Fe   | 0.618639  | -0.350455 | 0.738725  |
| O    | 1.681544  | -1.390310 | -0.722066 |
| C    | 2.938064  | -1.526918 | -0.818136 |
| O    | 3.779572  | -1.018533 | 0.019813  |
| C    | 3.541067  | -2.333530 | -1.942193 |
| N    | 0.228444  | 1.591478  | 0.083203  |
| C    | 1.129482  | 2.571356  | 0.068348  |
| N    | 0.587188  | 3.696942  | -0.465730 |
| C    | -0.729941 | 3.439635  | -0.818363 |
| C    | -0.927907 | 2.123310  | -0.465401 |
| C    | -1.635149 | 4.455662  | -1.433490 |
| N    | -1.125604 | -1.322449 | 0.192918  |
| C    | -1.236936 | -2.182423 | -0.818182 |
| N    | -2.541577 | -2.484260 | -1.027588 |
| C    | -3.323755 | -1.787004 | -0.114566 |
| C    | -2.418162 | -1.072863 | 0.636672  |
| C    | -4.815014 | -1.873278 | -0.070243 |
| H    | 3.899223  | -3.295679 | -1.543003 |
| H    | 4.414084  | -1.808795 | -2.353489 |
| H    | 2.802433  | -2.523404 | -2.729723 |
| H    | 2.149066  | 2.489228  | 0.432154  |
| H    | 1.073269  | 4.579739  | -0.596505 |
| H    | -1.828633 | 1.526851  | -0.574603 |
| H    | -1.781059 | 5.328338  | -0.776359 |
| H    | -1.246360 | 4.821873  | -2.397473 |
| H    | -2.621199 | 4.010024  | -1.620316 |
| H    | -0.406286 | -2.569884 | -1.399196 |
| H    | -2.889394 | -3.122195 | -1.738307 |
| H    | -2.601878 | -0.401242 | 1.468750  |
| H    | -5.160890 | -2.901392 | 0.123917  |
| H    | -5.272947 | -1.536669 | -1.014425 |
| H    | -5.200463 | -1.234639 | 0.735480  |
| O    | 2.298590  | 0.006000  | 1.643552  |
| H    | 3.187736  | -0.504691 | 0.848632  |
| H    | 2.511703  | -0.184134 | 2.572154  |
| O    | -0.458990 | 0.387659  | 2.597599  |
| H    | -0.444828 | -0.023727 | 3.481340  |
| H    | -0.243581 | 1.328050  | 2.736644  |



## Supporting Information Table 7:

Coordinates [ $\text{\AA}$ ] of optimized Fe-PAH-NO Complex

| Atom | X         | Y         | Z         |
|------|-----------|-----------|-----------|
| Fe   | 0.499160  | -0.633197 | 0.615451  |
| N    | 0.444718  | 1.451185  | -0.014752 |
| C    | 1.439205  | 2.109375  | -0.604489 |
| N    | 1.095635  | 3.409679  | -0.785353 |
| C    | -0.186168 | 3.617467  | -0.289052 |
| C    | -0.569005 | 2.380101  | 0.181377  |
| C    | -0.877539 | 4.940017  | -0.331827 |
| N    | -1.412085 | -0.863143 | -0.228834 |
| C    | -1.612852 | -1.272820 | -1.477522 |
| N    | -2.943008 | -1.320676 | -1.737070 |
| C    | -3.643246 | -0.924050 | -0.605939 |
| C    | -2.664554 | -0.644990 | 0.322520  |
| C    | -5.133897 | -0.868236 | -0.543341 |
| O    | 1.469541  | -1.322176 | -0.966046 |
| C    | 2.738885  | -1.302165 | -1.245138 |
| O    | 3.568301  | -0.560628 | -0.653962 |
| C    | 3.222665  | -2.264122 | -2.314798 |
| O    | 2.344564  | -0.049963 | 1.506753  |
| O    | -0.353924 | 0.351722  | 2.427936  |
| H    | 2.395950  | 1.682509  | -0.894247 |
| H    | 1.685368  | 4.116645  | -1.216183 |
| H    | -1.512543 | 2.098260  | 0.637099  |
| H    | -1.008321 | 5.300371  | -1.365048 |
| H    | -1.874741 | 4.854826  | 0.120066  |
| H    | -0.322322 | 5.711499  | 0.225906  |
| H    | -0.831884 | -1.540391 | -2.181751 |
| H    | -3.358978 | -1.610869 | -2.617778 |
| H    | -2.781433 | -0.303645 | 1.346025  |
| H    | -5.586777 | -1.856515 | -0.723523 |
| H    | -5.549775 | -0.166051 | -1.283875 |
| H    | -5.453731 | -0.532789 | 0.452082  |
| H    | 2.532796  | -2.278552 | -3.169960 |
| H    | 3.241987  | -3.280783 | -1.890648 |
| H    | 4.234269  | -1.995440 | -2.640015 |
| H    | 2.957149  | -0.131874 | 0.663107  |
| H    | 2.739110  | -0.672163 | 2.147254  |
| H    | -0.388302 | -0.187045 | 3.244213  |
| H    | 0.232865  | 1.108659  | 2.621885  |
| N    | 0.384522  | -2.124191 | 1.619789  |
| O    | 0.021732  | -2.462326 | 2.684876  |

## Supporting Information Table 8:

Coordinates [ $\text{\AA}$ ] of optimized Fe-PAH-O<sub>2</sub> Complex

| Atom | X         | Y         | Z         |
|------|-----------|-----------|-----------|
| Fe   | 0.409908  | -0.653255 | 0.416641  |
| N    | 0.541410  | 1.412519  | 0.002028  |
| C    | 1.490079  | 1.995012  | -0.730998 |
| N    | 1.357435  | 3.341348  | -0.669563 |
| C    | 0.275662  | 3.661342  | 0.142352  |
| C    | -0.216242 | 2.441124  | 0.550469  |
| C    | -0.148515 | 5.064107  | 0.426387  |
| N    | -1.590700 | -0.792993 | -0.160774 |
| C    | -2.379023 | -1.842952 | 0.083105  |
| N    | -3.627517 | -1.595708 | -0.371939 |
| C    | -3.667318 | -0.331614 | -0.947010 |
| C    | -2.383972 | 0.147036  | -0.806334 |
| C    | -4.897149 | 0.250892  | -1.560157 |
| O    | 1.399416  | -1.295299 | -1.088802 |
| C    | 2.680195  | -1.339317 | -1.378458 |
| O    | 3.533719  | -0.641328 | -0.786862 |
| C    | 3.088809  | -2.302204 | -2.472834 |
| O    | 2.293555  | -0.374331 | 1.452125  |
| O    | -0.224056 | 0.038122  | 2.434017  |
| H    | 2.283491  | 1.481549  | -1.265929 |
| H    | 1.963292  | 4.009606  | -1.138753 |
| H    | -1.050838 | 2.233512  | 1.212020  |
| H    | -0.436044 | 5.599025  | -0.493130 |
| H    | -1.016690 | 5.062817  | 1.098558  |
| H    | 0.652766  | 5.640854  | 0.915706  |
| H    | -2.088363 | -2.754549 | 0.594922  |
| H    | -4.409586 | -2.242440 | -0.309468 |
| H    | -1.982203 | 1.101488  | -1.128527 |
| H    | -5.715878 | 0.340957  | -0.828160 |
| H    | -5.261883 | -0.360389 | -2.401253 |
| H    | -4.681360 | 1.255411  | -1.947314 |
| H    | 2.449729  | -2.173316 | -3.358110 |
| H    | 2.940410  | -3.333205 | -2.114678 |
| H    | 4.142941  | -2.153538 | -2.732129 |
| H    | 2.923808  | -0.301662 | 0.646816  |
| H    | 2.578605  | -1.198326 | 1.893757  |
| H    | -0.806737 | 0.802293  | 2.289592  |
| H    | 0.599759  | 0.392708  | 2.827158  |
| O    | 0.329129  | -2.389070 | 1.221012  |
| O    | -0.277059 | -2.767453 | 2.264617  |

## Complete Reference 31

Gaussian 03, Revision C.03, Frisch, M. J.; Trucks, G. W.; Schlegel, H. B.; Scuseria, G. E.; Robb, M. A.; Cheeseman, J. R.; Montgomery, Jr., J. A.; Vreven, T.; Kudin, K. N.; Burant, J. C.; Millam, J. M.; Iyengar, S. S.; Tomasi, J.; Barone, V.; Mennucci, B.; Cossi, M.; Scalmani, G.; Rega, N.; Petersson, G. A.; Nakatsuji, H.; Hada, M.; Ehara, M.; Toyota, K.; Fukuda, R.; Hasegawa, J.; Ishida, M.; Nakajima, T.; Honda, Y.; Kitao, O.; Nakai, H.; Klene, M.; Li, X.; Knox, J. E.; Hratchian, H. P.; Cross, J. B.; Bakken, V.; Adamo, C.; Jaramillo, J.; Gomperts, R.; Stratmann, R. E.; Yazyev, O.; Austin, A. J.; Cammi, R.; Pomelli, C.; Ochterski, J. W.; Ayala, P. Y.; Morokuma, K.; Voth, G. A.; Salvador, P.; Dannenberg, J. J.; Zakrzewski, V. G.; Dapprich, S.; Daniels, A. D.; Strain, M. C.; Farkas, O.; Malick, D. K.; Rabuck, A. D.; Raghavachari, K.; Foresman, J. B.; Ortiz, J. V.; Cui, Q.; Baboul, A. G.; Clifford, S.; Cioslowski, J.; Stefanov, B. B.; Liu, G.; Liashenko, A.; Piskorz, P.; Komaromi, I.; Martin, R. L.; Fox, D. J.; Keith, T.; Al-Laham, M. A.; Peng, C. Y.; Nanayakkara, A.; Challacombe, M.; Gill, P. M. W.; Johnson, B.; Chen, W.; Wong, M. W.; Gonzalez, C.; and Pople, J. A.; Gaussian, Inc., Wallingford CT, 2004.
